# Supplementary material for: The genome of a hadal sea cucumber reveals novel adaptive strategies to deep-sea environments
Source: PubMed Central journal article supplement — iScience. 2022 Nov 9;25(12):105545. doi: 10.1016/j.isci.2022.105545 (PMC9700323; doi:10.1016/j.isci.2022.105545), 2022-11-09
Supplement: mmc1.pdf [file mmc1.pdf]

## **Supplemental information**

### **The genome of a hadal sea cucumber reveals novel adaptive strategies to deep-sea environments**

**Guangming Shao, Tianliang He, Yinnan Mu, Pengfei Mu, Jingqun Ao, Xihuang Lin, Lingwei Ruan, YuGuang Wang, Yuan Gao, Dinggao Liu, Liangsheng Zhang, and Xinhua Chen**

1    **Supplementary Materials**

2    **Supplementary figures**

3    **Figure S1.** GenomeScope plot for YHSC genome. Related to STAR Methods.

4    **Figure S2.** Scatterplot of GC content on read depth in the YHSC genome. Related to STAR Methods.

5    **Figure S3.** The quality assessment of the D152 DNA sample detected by Agilent 4200 Bioanalyzer.  
6    Related to STAR Methods.

7    **Figure S4.** Bayesian phylogenies of extant Holothuroidea based on (a) three concatenated nuclear genes  
8    (18S rRNA, 28S rRNA, and histone H3) and (b) two mitochondrial genes (16S rRNA and COI). Related  
9    to Figure 1.

10   **Figure S5.** The whole paranome *Ks* distributions using histograms and kernel density estimates for  
11   YHSC and *A. japonicus* together with the *Ks* distribution of their one-to-one orthologs. Related to STAR  
12   Methods.

13   **Figure S6.** The gain or loss of gene families and the statistics for the unique domains across seven  
14   invertebrate genomes. Related to Figure 2 to Figure 4.

15   **Figure S7.** The most common functions of the expanded domains in the YHSC genome. Related to  
16   Figure 2 to Figure 4.

17   **Figure S8.** Heatmap depicting the quantitative variation of the pfam domains involved in translation  
18   factors and ribosomal proteins among the species analyzed. Related to Figure 3.

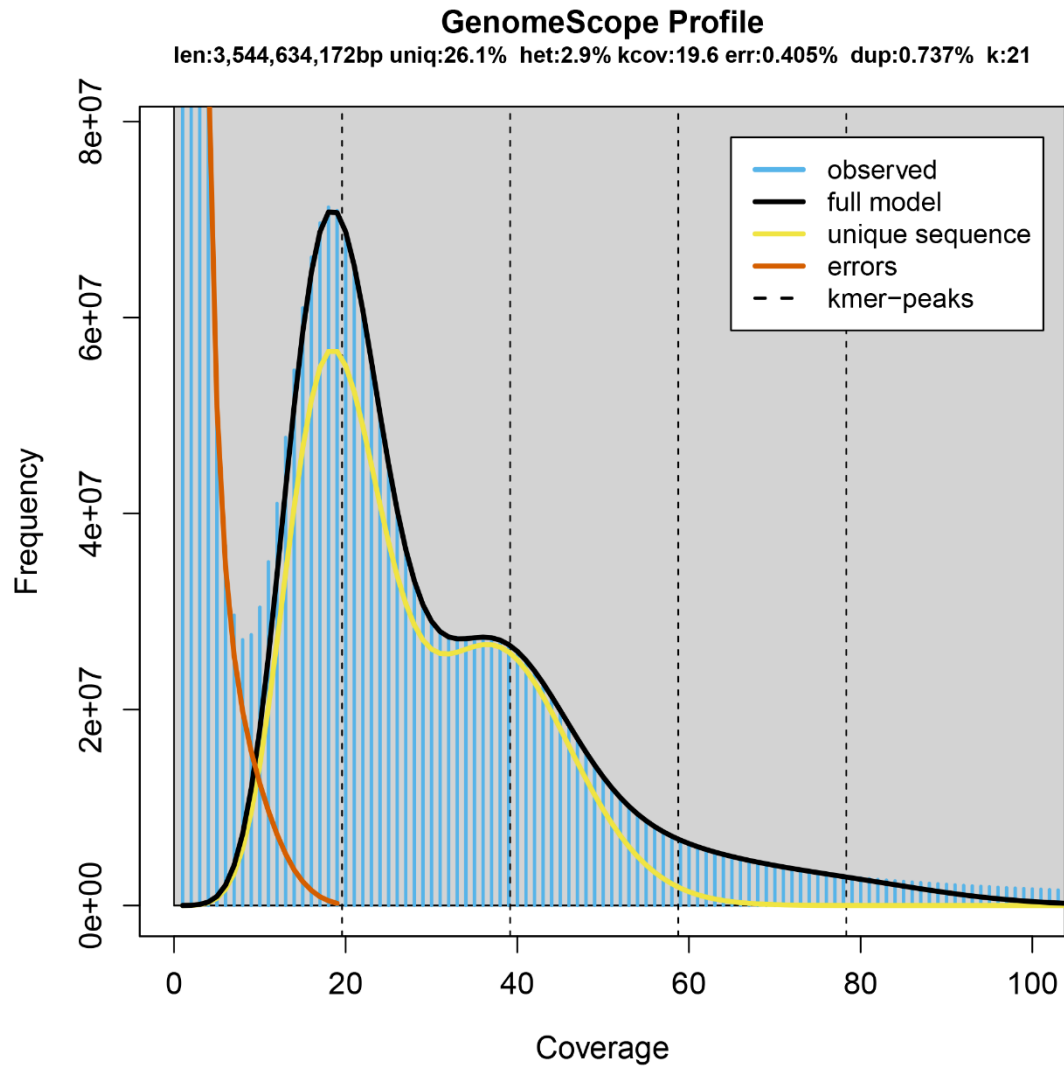

19

20 **Figure S1.** GenomeScope plot for YHSC genome. Related to STAR Methods.

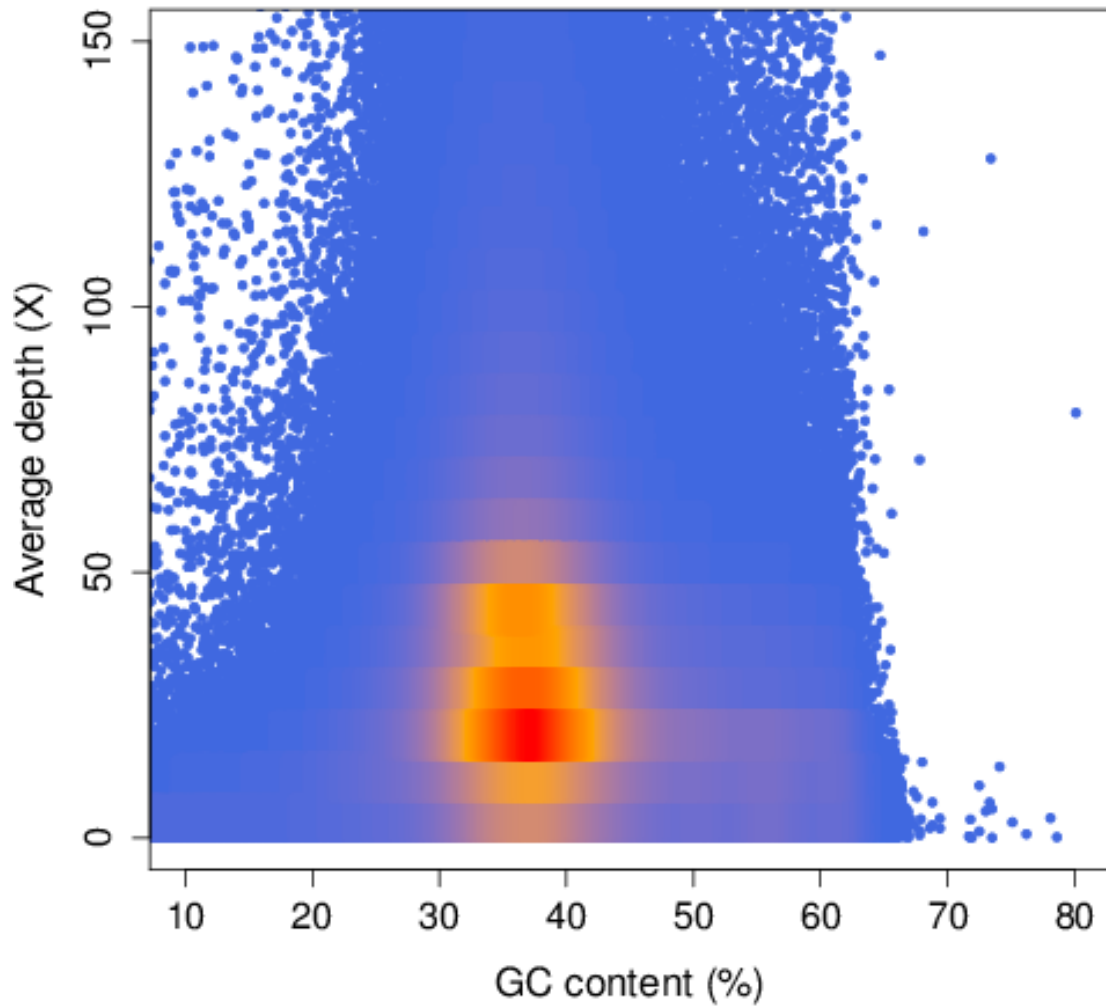

**Figure S2.** Scatterplot of GC content on read depth in the YHSC genome. Related to STAR Methods.. The x-axis shows the GC content of nonoverlapping 10 KB sliding windows along the genome; the y-axis shows the average per-base sequencing coverage.

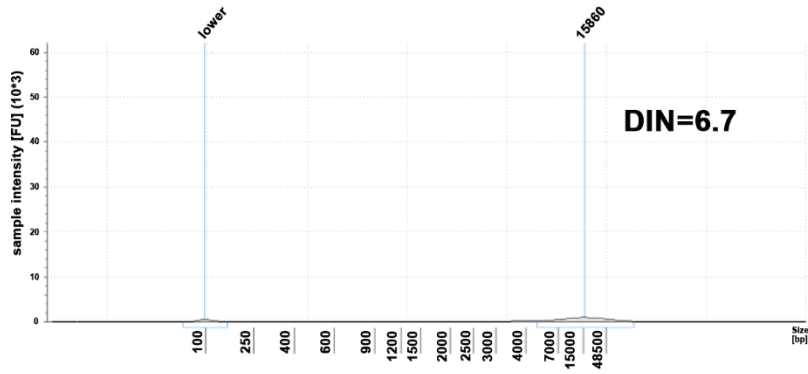

**Figure S3.** The quality assessment of the D152 DNA sample detected by Agilent 4200 Bioanalyzer. Related to STAR Methods. The character “lower” in the Figure indicated DNA marker. The peak with a size of 15860bp represents the D152 DNA sample.

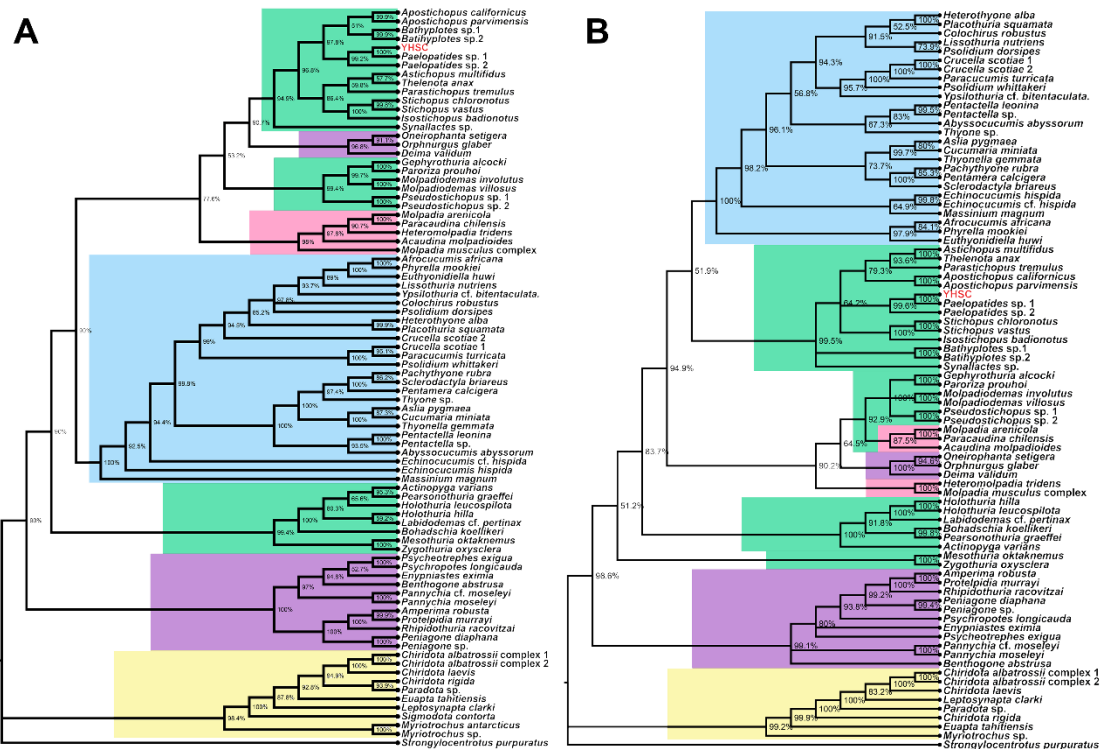

**Figure S4.** Bayesian phylogenies of extant Holothuroidea based on (a) three concatenated nuclear genes (18S rRNA, 28S rRNA, and histone H3) and (b) two mitochondrial genes (16S rRNA and COI). Related to Figure 1. The colored boxes surround clades indicated different taxa according to previous report: blue= Dendrochirotida; orange = Dactylochirotida; yellow = Apodida; purple = Elaspodida; red = Molpadida; and green = Aspidochirotida.

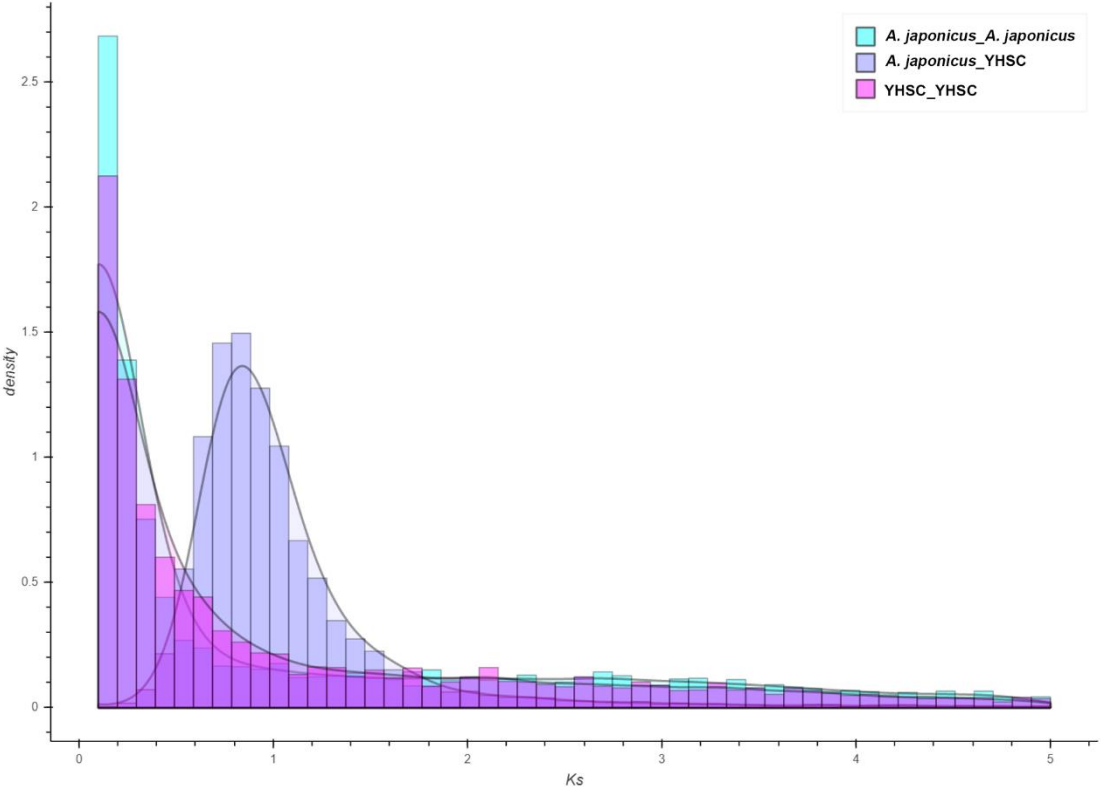

44

45 **Figure S5.** The whole paranome  $K_s$  distributions using histograms and kernel density estimates for  
46 YHSC and *A. japonicus* together with the  $K_s$  distribution of their one-to-one orthologs. Related to STAR  
47 Methods.

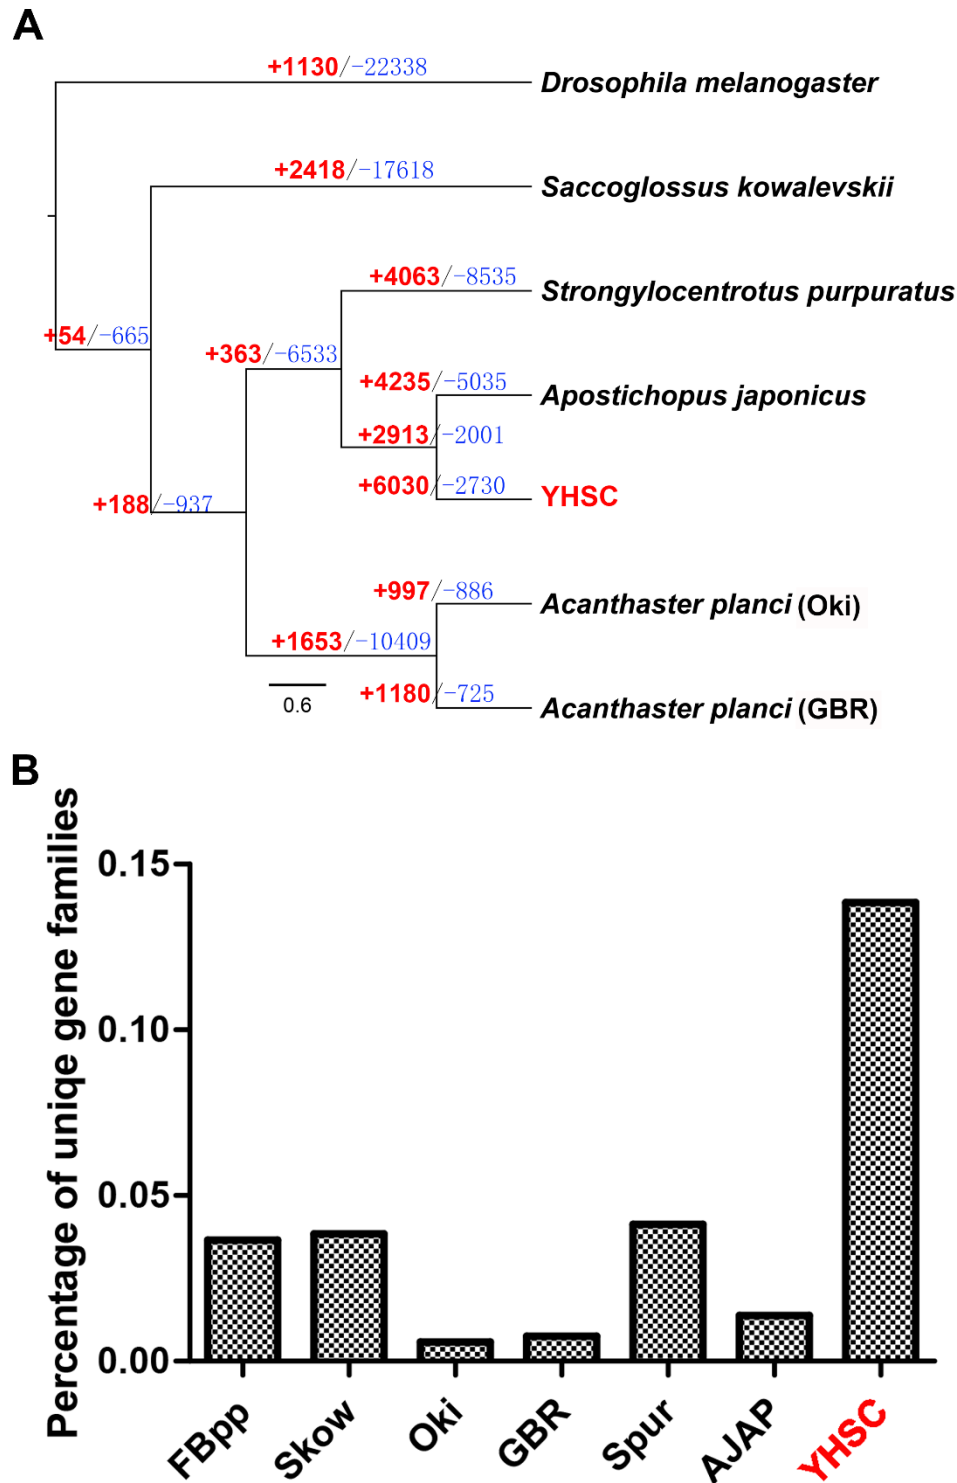

48

49 **Figure S6.** The gain or loss of gene families and the statistics for the unique domains across seven  
50 invertebrate genomes. Related to Figure 2 to Figure 4: “Comparative genomics”. a, Phylogenetic tree  
51 constructed using the species tree root inference from duplication event (STRIDE) algorithm in  
52 OrthoFinder (version 2.3.8) based on the protein sequences from seven invertebrate genomes. The red  
53 and blue numbers on each branch show the numbers of gene families gained and lost. The scale bar  
54 indicates sequence divergence. b, the percentage of unique Pfam domains in each species analyzed.

55

56

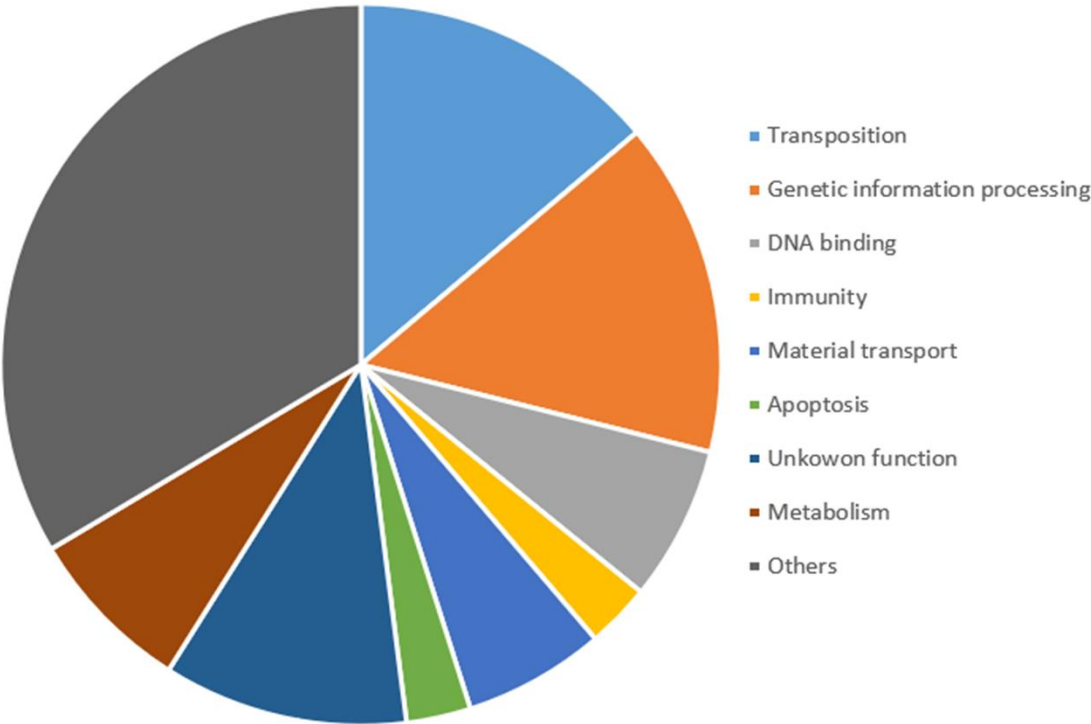

57

58 **Figure S7.** The most common functions of the expanded domains in the YHSC genome. Related to  
59 Figure 2 to Figure 4.

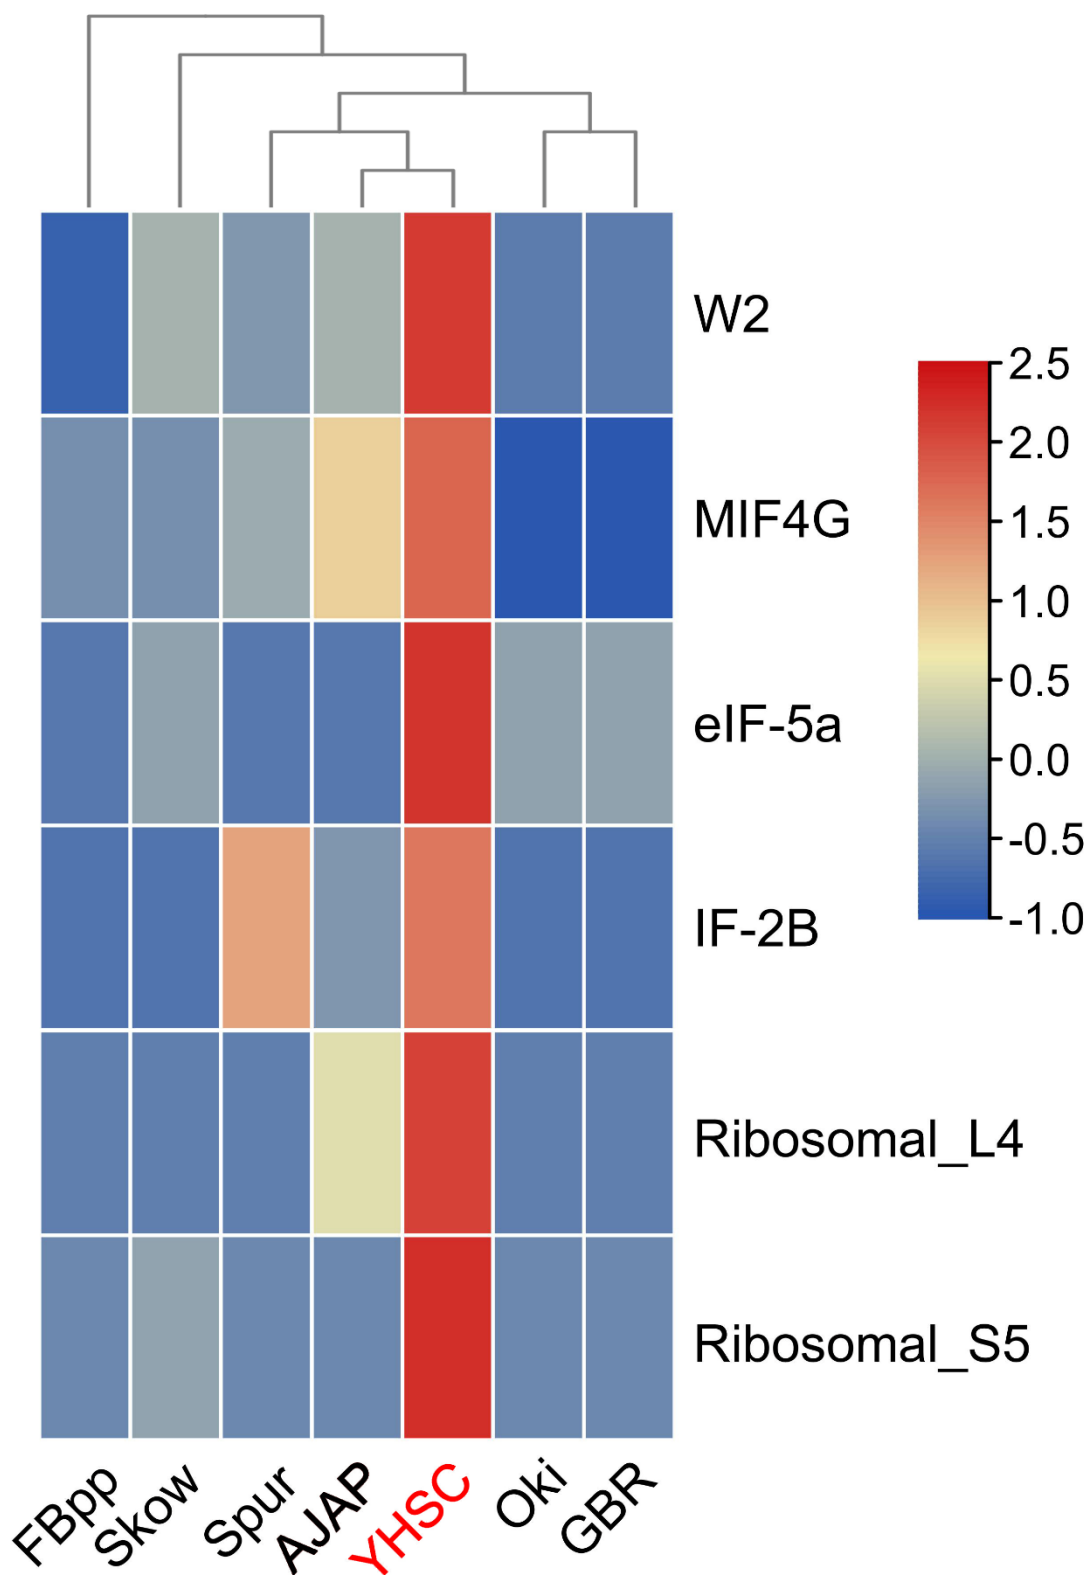

**Figure S8.** Heatmap depicting the quantitative variation of the pfam domains involved in translation factors and ribosomal proteins among the species analyzed. Related to Figure 3. The variation of the scale bar in color corresponds to the z-score of pfam domain number. The bigger the z-score, the redder the color. The smaller the z-score, the bluer the color. Only the domains in which YHSC genome has

65 more members than the other genomes are shown. Noting that the domains of W2, elf-5a, Ribosomal\_L4  
 66 and Ribosomal\_S5 reach the level of expansion, while MIF4G and IF-2B do not.

67

68 **Supplementary tables**

69 **Table S2.** Genome characteristics estimated by GenomeScope. Related to STAR Methods.

70 **Table S3.** Statistics of the PacBio subreads. Related to STAR Methods.

71 **Table S4.** Contamination detection and exclusion. Related to STAR Methods.

72 **Table S5.** Properties of the YHSC genome assembly. Related to STAR Methods.

73 **Table S6.** Assessment of YHSC genome assembly quality based on the successful mapping of the  
 74 Illumina clean reads to the genome. Related to STAR Methods.

75 **Table S7.** BUSCO evaluation of the YHSC genome assembly. Related to STAR Methods.

76 **Table S8.** Numbers of genes obtained using the three different prediction methods. Related to STAR  
 77 Methods.

78 **Table S10.** Percentage divergence between the YHSC and species of *Paelopatides*, *Apostichopus*, and  
 79 *Bathyploetes*. Related to Figure 1.

80 **Table S14.** Relative abundances of various fatty acids in membrane phospholipids of *A. japonicus* and  
 81 the YHSC. Related to Figure 2.

82

83 **Table S2.** Genome characteristics estimated by GenomeScope. Related to STAR Methods.

| Property              | Min              | Max              |
|-----------------------|------------------|------------------|
| Heterozygosity        | 2.89%            | 2.90%            |
| Genome Haploid Length | 3,542,080,715 bp | 3,544,634,172 bp |
| Genome Repeat Length  | 2,618,594,627 bp | 2,620,482,350 bp |
| Genome Unique Length  | 923,486,088 bp   | 924,151,822 bp   |
| Model Fit             | 87.95%           | 98.52%           |
| Read Error Rate       | 0.40%            | 0.40%            |

84

85 **Table S3.** Statistics of the PacBio subreads. Related to STAR Methods.

| Sample ID          | MB1             | MB2             | MB3            | Total           |
|--------------------|-----------------|-----------------|----------------|-----------------|
| Subreads number    | 25,755,660      | 26,309,430      | 10,991,427     | 63,056,517      |
| Subreads base (bp) | 197,864,419,961 | 201,749,020,982 | 91,261,630,410 | 490,875,071,353 |
| Average length     | 7,682           | 7,668           | 95,093         |                 |
| Subreads n50       | 11,077          | 10,315          | 12,683         |                 |

86

87 **Table S4.** Contamination detection and exclusion<sup>1</sup>. Related to STAR Methods.

|                                       | Gene number | Contig number | Percentage (%) |
|---------------------------------------|-------------|---------------|----------------|
| Total                                 | 60469       | 59054         |                |
| Genes from bacteria <sup>2</sup>      | 2801        |               | 4.63           |
| Genes from deuterostomia <sup>3</sup> | 52257       |               | 86.42          |
| Genes with no sequence similarity     | 5411        |               | 8.95           |
| Contigs containing bacterial genes    |             | 1872          |                |
| Removed contigs <sup>4</sup>          |             | 876           |                |
| Removed bacterial genes               | 2151        |               |                |

88 <sup>1</sup>Contamination detection was performed by searching *Paelopatides* sp. proteins against the non-  
89 redundant bacterial and deuterostome proteins retrieved from the NCBI nr database with a e-value of 1e-  
90 5. <sup>2,3</sup>Taxonomy assignment for each query sequence was based on the best hits. A gene is assigned to  
91 bacteria if it encoded a protein that is most similar to bacterial protein, while assigned to YHSC if most  
92 similarity to deuterostome proteins. <sup>4</sup>Contigs with  $\geq 50\%$  bacterial proteins or no deuterostome proteins  
93 were removed.

94

95 **Table S5.** Properties of the YHSC genome assembly. Related to STAR Methods.

| Stat Type                                                | Contig Length (bp) | Contig Number |
|----------------------------------------------------------|--------------------|---------------|
| Before redundant and contaminated sequences were removed |                    |               |
| Total                                                    | 3,821,742,837      | 59,054        |
| Max                                                      | 2,300,492          |               |
| Number $\geq 2000$ bp                                    | -                  | 59,018        |
| N50                                                      | 133,867            |               |
| N60                                                      | 100,351            |               |
| N70                                                      | 71,896             |               |

|                                                         |               |        |
|---------------------------------------------------------|---------------|--------|
| N80                                                     | 48,202        |        |
| N90                                                     | 27,861        |        |
| Redundant contigs                                       |               | 2740   |
| Contaminated contigs                                    |               | 876    |
| After redundant and contaminated sequences were removed |               |        |
| Total                                                   | 3,704,652,769 | 55,447 |
| Max                                                     | 2,300,492     |        |
| Number $\geq$ 2000bp                                    |               | 55,425 |
| N50                                                     | 137,082       |        |
| N60                                                     | 102,343       |        |
| N70                                                     | 73,213        |        |
| N80                                                     | 49,190        |        |
| N90                                                     | 28,545        |        |

96

97 **Table S6.** Assessment of YHSC genome assembly quality based on the successful mapping of the  
98 Illumina clean reads to the genome. Related to STAR Methods.

| Sample                    | HS              |
|---------------------------|-----------------|
| Clean Reads               | 1,394,029,234   |
| Clean Bases(bp)           | 209,104,385,100 |
| Mapped Reads              | 1,381,633,889   |
| Mapped Reads Rate (%)     | 99.11%          |
| Mapped Bases              | 207,245,083,350 |
| Mean Depth                | 56.44           |
| Coverage Rate (%)         | 95.98           |
| Coverage at least 4X (%)  | 94.05           |
| Coverage at least 10X (%) | 90.48           |
| Coverage at least 20X (%) | 76.35           |

99

100 **Table S7.** BUSCO evaluation of the YHSC genome assembly. Related to STAR Methods.

| Items | Number | Percent (%) |
|-------|--------|-------------|
|-------|--------|-------------|

|                                     |     |      |
|-------------------------------------|-----|------|
| Complete BUSCOs (C)                 | 424 | 89.4 |
| Complete and single-copy BUSCOs (S) | 228 | 76.9 |
| Complete and duplicated BUSCOs (D)  | 196 | 12.5 |
| Fragmented BUSCOs (F)               | 32  | 8.2  |
| Missing BUSCOs (M)                  | 21  | 2.4  |
| Total BUSCO groups searched         | 255 | 100  |

**Table S8.** Numbers of genes obtained using the three different prediction methods. Related to STAR Methods.

|         | De novo | Homolog | Transcriptome-based | Total  |
|---------|---------|---------|---------------------|--------|
| numbers | 43841   | 47881   | 11482               | 57,522 |
| weights | 72.50%  | 79.18%  | 18.99%              |        |

**Table S10.** Percentage divergence between the YHSC and species of *Paelopatides*, *Apostichopus*, and *Bathyploetes*. Related to Figure 1.

| <i>Paelopatides</i><br>sp. 1 | <i>Paelopatides</i><br>sp. 2 | <i>Apostichopus</i><br><i>japonicus</i> | <i>Apostichopus</i><br><i>californicus</i> | <i>Apostichopus</i><br><i>parvimensis</i> | <i>Bathyploetes</i><br>sp. 1 | <i>Bathyploetes</i><br>sp. 2 |
|------------------------------|------------------------------|-----------------------------------------|--------------------------------------------|-------------------------------------------|------------------------------|------------------------------|
| 1.05                         | 11.87                        | 24.14                                   | 27.47                                      | 25.57                                     | 18.62                        | 18.32                        |

**Table S14.** Relative abundances of various fatty acids in membrane phospholipids of *A. japonicus* and the YHSC. Related to Figure 2. Asterisks indicate a significant difference in relative content between the two taxa: \*,  $P < 0.05$ ; \*\*,  $P < 0.01$  (Student's t test). Red type indicates the fatty acid that differed most substantially in relative content between *A. japonicus* and YHSC.

| Fatty acid type | <i>Apostichopus japonicus</i> (N=6) | YHSC (N=3) | p-value |
|-----------------|-------------------------------------|------------|---------|
|-----------------|-------------------------------------|------------|---------|

|                        |                 |                 |         |
|------------------------|-----------------|-----------------|---------|
| C6:0                   | 0.00401±0.00188 | 0±0             | 0.18766 |
| C8:0                   | 0.00219±0.00142 | 0±0             | 0.32786 |
| C10:0                  | 0.00035±0.00035 | 0±0             | 0.51649 |
| C11:0                  | 0±0             | 0±0             | -       |
| C12:0                  | 0.00319±0.00276 | 0±0             | 0.4548  |
| C13:0                  | 0±0             | 0±0             | -       |
| C14:1                  | 0.0091±0.00659  | 0±0             | 0.37703 |
| C14:0*                 | 0.02871±0.01568 | 0.19478±0.09891 | 0.04627 |
| C15:1                  | 0.00592±0.00533 | 0.02613±0.02436 | 0.29245 |
| C15:0                  | 0.00051±0.00051 | 0.03486±0.03486 | 0.17622 |
| C16:1                  | 0.0907±0.04513  | 0.13178±0.12191 | 0.70355 |
| C16:0*                 | 0.28381±0.11719 | 7.48512±4.04031 | 0.0299  |
| C17:1                  | 0.00205±0.00105 | 0.01222±0.012   | 0.24466 |
| C17:0*                 | 0.01628±0.00363 | 0±0             | 0.01821 |
| C18:3-cis-6,9,12       | 0.00073±0.0004  | 0±0             | 0.24883 |
| C18:2-cis-9,12         | 0.14296±0.04189 | 0±0             | 0.0525  |
| C18:1-trans-9          | 0.05668±0.01643 | 0.02401±0.01105 | 0.23467 |
| C18:3-cis-9,12,15      | 0.00681±0.00368 | 0±0             | 0.24727 |
| C18:1-cis-9            | 0.2648±0.08715  | 0.27697±0.26249 | 0.95625 |
| C18:0                  | 0.15231±0.07031 | 3.06367±1.89066 | 0.05153 |
| C20:4-cis-5,8,11,14    | 1.11441±0.52437 | 0.60275±0.30362 | 0.53931 |
| C20:5-cis-5,8,11,14,17 | 0.287±0.11066   | 0.71701±0.37478 | 0.18697 |
| C20:3-cis-8, 11,14     | 0.00094±0.00094 | 0±0             | 0.51649 |
| C18:2-trans-9,12       | 0.00001±0.00001 | 0.00002±0       | 0.49223 |
| C20:1-cis-11           | 0.13576±0.11258 | 0.06358±0.06197 | 0.68341 |
| C20:3-cis-11,14,17     | 0.00001±0.00001 | 0.00002±0       | 0.50021 |
| C20:0                  | 0.06501±0.02083 | 0±0             | 0.07048 |
| C20:2-cis-11,14        | 0.04081±0.01823 | 0±0             | 0.17015 |
| C22:5n6- 4,7,10,13,16  | 0.01267±0.00693 | 0±0             | 0.25178 |
| C22:6**                | 0.04292±0.00735 | 0.3119±0.04211  | 0.00004 |
| C22:4                  | 0.01988±0.01077 | 0±0             | 0.24762 |
| C22:5n3-7,10,13,16,19  | 0.03586±0.0178  | 0±0             | 0.21124 |
| C22:2-cis-13,16        | 0±0             | 0±0             | -       |

|              |                 |                 |         |
|--------------|-----------------|-----------------|---------|
| C22:1-cis-13 | 0.02083±0.00642 | 0.04209±0.01991 | 0.22762 |
| C22:0        | 0.0389±0.0155   | 0±0             | 0.13022 |
| C23:0        | 0±0             | 0±0             | -       |
| C24:1        | 0.06239±0.02597 | 0.07151±0.00798 | 0.81903 |
| C24:0        | 0±0             | 0±0             | -       |

---
